# Supplementary material for: Characterization and genomic analysis of a novel halovirus infecting Chromohalobacter beijerinckii
Source: Front Microbiol. 2022 Dec 7;13:1041471. doi: 10.3389/fmicb.2022.1041471 (PMC9769972; doi:10.3389/fmicb.2022.1041471)
Supplement: Supplementary file 3 [file Table_3.XLSX]

## Sheet: sim_MA_genCol
genome	phiP27	118970_sal3	ST64B	SfV	SfII	SfIV	KS10	BcepMu	phiE255	JBD25	B3	PM105	Ps60	CF118c	BR58a	CF127b	CF53b	JBD18	SS2019XII	JBD67	CF177a	BR141c	CF125a	CF78a	B23	YPCBV-1	12B12	SfMu	D108	Mu	3927AP2	SuMu	RR1-B	RcapMu
phiP27	100	31.193	31.002	21.622	23.45	27.465	0	0.073	0.102	0	0	0	0	0	0	0	0	0.056	0	0	0	0	0	0	0.113	0.094	0	0.975	0.9	0.682	0	0	0	0
118970_sal3	31.193	100	78.883	36.211	39.596	41.811	0	0	0	0	0	0	0	0	0	0	0	0	0	0	0	0	0	0	0	0	0	0.866	0.582	0.656	0.076	0	0	0
ST64B	31.002	78.883	100	34.332	38.266	41.496	0	0	0	0	0	0	0	0	0	0	0	0	0	0	0	0	0	0	0	0	0	0.888	0.718	0.764	0	0	0	0
SfV	21.622	36.211	34.332	100	62.031	60.287	0.062	0	0	0	0	0.053	0.053	0.118	0.067	0.067	0.068	0.054	0.029	0.109	0.11	0.053	0.053	0.053	0.078	0.238	0	0.28	0.358	0.328	0	0	0	0
SfII	23.45	39.596	38.266	62.031	100	63.776	0	0	0	0	0	0	0	0	0	0	0	0	0	0	0	0	0	0	0.078	0	0	0.183	0.226	0.228	0	0	0	0
SfIV	27.465	41.811	41.496	60.287	63.776	100	0	0	0	0	0	0	0	0	0	0	0	0	0	0	0	0	0	0	0.122	0.186	0	0.286	0.314	0.316	0	0	0	0
KS10	0	0.019	0	0.062	0.028	0.028	100	3.131	2.592	1.715	3.361	3.04	3.147	3.24	3.393	3.435	3.442	2.682	2.837	2.794	3.015	2.872	2.875	2.873	1.314	1.251	0.116	0	0.059	0	0.112	0.222	1.265	1.989
BcepMu	0.073	0.044	0.065	0	0.028	0	3.131	100	79.312	6.995	9.184	9.16	9.144	10.103	10.585	10.721	10.743	9.688	8.888	9.373	9.392	9.055	9.063	9.058	1.661	4.583	0.288	1.001	1.119	1.067	0.108	0.092	0.853	0.872
phiE255	0.102	0.019	0.028	0	0.028	0	2.592	79.312	100	6.704	9.854	8.2	7.653	9.669	10.125	10.254	10.274	8.717	8.431	8.697	9.064	8.724	8.732	8.727	1.751	4.313	0.679	1.078	1.194	1.241	0.154	0	1.238	1.009
JBD25	0	0	0	0	0	0	1.715	6.995	6.704	100	40.938	37.803	46.409	45.736	43.814	44.352	44.437	50.899	53.279	46.715	49.743	49.213	49.255	49.226	2.051	2.805	0.415	3.09	3.232	3.257	0.753	0.532	0.255	0.693
B3	0	0.022	0.032	0	0	0	3.361	9.184	9.854	40.938	100	59.573	52.538	51.055	48.691	49.318	49.378	62.927	63.091	61.549	62.189	61.568	61.621	61.585	1.536	3.893	0	0.069	0.069	0.069	0.139	0	0.443	0.477
PM105	0	0	0	0	0	0	3.04	9.16	8.2	37.803	59.573	100	86.589	70.516	65.186	63.925	63.838	75.813	75.098	79.282	78.564	81.094	81.174	81.127	1.698	4.999	0.291	2.695	2.681	2.896	0.068	0	0	0.603
Ps60	0	0	0	0	0	0	3.147	9.144	7.653	46.409	52.538	86.589	100	70.916	65.905	64.654	64.569	68.718	70.588	73.15	73.135	73.913	73.991	73.948	1.573	5.057	0.469	2.663	2.676	2.885	0	0	0	0.603
CF118c	0	0	0	0.118	0.086	0	3.24	10.103	9.669	45.736	51.055	70.516	70.916	100	94.803	93.202	93.165	79.607	80.053	81.545	90.693	89.486	89.56	89.503	2.074	5.553	0.312	2.925	2.939	3.19	0.149	0	0	0.693
BR58a	0	0	0	0.067	0.062	0	3.393	10.585	10.125	43.814	48.691	65.186	65.905	94.803	100	98.36	98.311	75.016	75.511	76.711	86.267	84.431	84.533	84.476	2.175	5.821	0.327	3.064	3.078	3.343	0.156	0	0	0.697
CF127b	0	0	0	0.067	0.063	0	3.435	10.721	10.254	44.352	49.318	63.925	64.654	93.202	98.36	100	99.762	73.776	74.149	77.246	85.71	82.908	82.992	82.938	2.204	5.896	0.332	3.103	3.117	3.385	0.158	0	0	0.705
CF53b	0	0	0	0.068	0.063	0	3.442	10.743	10.274	44.437	49.378	63.838	64.569	93.165	98.311	99.762	100	73.681	74.094	77.156	85.667	82.813	82.9	82.844	2.209	5.908	0.332	3.109	3.123	3.392	0.158	0	0	0.707
JBD18	0.056	0	0	0	0	0	2.682	9.688	8.717	50.899	62.927	75.813	68.718	79.607	75.016	73.776	73.681	100	91.883	83.888	87.087	87.456	87.534	87.483	1.509	5.015	0.285	2.857	2.867	2.897	0.14	0	0	0.759
SS2019XII	0	0	0	0	0	0	2.837	8.888	8.431	53.279	63.091	75.098	70.588	80.053	75.511	74.149	74.094	91.883	100	82.828	87.863	87.94	88.019	87.968	1.66	5.108	0.28	2.629	2.641	2.929	0.139	0	0	0.61
JBD67	0	0	0	0.109	0.079	0	2.794	9.373	8.697	46.715	61.549	79.282	73.15	81.545	76.711	77.246	77.156	83.888	82.828	99.477	89.506	89.359	89.458	89.403	1.895	5.48	0.478	2.714	2.727	2.941	0.139	0	0.167	0.68
CF177a	0	0	0	0.11	0.08	0	3.015	9.392	9.064	49.743	62.189	78.564	73.135	90.693	86.267	85.71	85.667	87.087	87.863	89.506	100	96.936	97.054	96.996	1.925	5.158	0.289	2.721	2.733	2.966	0.138	0	0	0.662
BR141c	0	0	0	0	0	0	2.872	9.055	8.724	49.213	61.568	81.094	73.913	89.486	84.431	82.908	82.813	87.456	87.94	89.359	96.936	100	99.616	99.558	1.762	4.862	0.279	2.638	2.651	2.875	0	0	0	0.602
CF125a	0	0	0	0	0	0	2.875	9.063	8.732	49.255	61.621	81.174	73.991	89.56	84.533	82.992	82.9	87.534	88.019	89.458	97.054	99.616	100	99.677	1.764	4.866	0.28	2.64	2.653	2.878	0	0	0	0.603
CF78a	0	0	0	0	0	0	2.873	9.058	8.727	49.226	61.585	81.127	73.948	89.503	84.476	82.938	82.844	87.483	87.968	89.403	96.996	99.558	99.677	100	1.762	4.863	0.28	2.639	2.651	2.876	0	0	0	0.603
B23	0.113	0	0	0.078	0.078	0.122	1.314	1.661	1.751	2.051	1.536	1.698	1.573	2.074	2.175	2.204	2.209	1.509	1.66	1.895	1.925	1.762	1.764	1.762	100	13.364	2.181	1.976	2.103	2.135	0	0	0	0.524
YPCBV-1	0.094	0	0	0.238	0.043	0.186	1.251	4.583	4.313	2.805	3.893	4.999	5.057	5.553	5.821	5.896	5.908	5.015	5.108	5.48	5.158	4.862	4.866	4.863	13.364	100	1.403	2.086	2.004	2.03	0	0	1.499	2.483
12B12	0.041	0	0	0	0	0	0.116	0.288	0.679	0.415	0	0.291	0.469	0.312	0.327	0.332	0.332	0.285	0.28	0.478	0.289	0.279	0.28	0.28	2.181	1.403	100	3.527	3.727	3.086	0.373	0.111	0.068	0
SfMu	0.975	0.866	0.888	0.28	0.183	0.286	0	1.001	1.078	3.09	0.069	2.695	2.663	2.925	3.064	3.103	3.109	2.857	2.629	2.714	2.721	2.638	2.64	2.639	1.976	2.086	3.527	100	89.399	90.121	1.355	1.497	0.188	0
D108	0.9	0.582	0.718	0.358	0.226	0.314	0.059	1.119	1.194	3.232	0.069	2.681	2.676	2.939	3.078	3.117	3.123	2.867	2.641	2.727	2.733	2.651	2.653	2.651	2.103	2.004	3.727	89.399	100	91.319	0.966	1.519	0.18	0
Mu	0.682	0.656	0.764	0.328	0.228	0.316	0	1.067	1.241	3.257	0.069	2.896	2.885	3.19	3.343	3.385	3.392	2.897	2.929	2.941	2.966	2.875	2.878	2.876	2.135	2.03	3.086	90.121	91.319	100	0.834	1.527	0.184	0.082
3927AP2	0	0.076	0	0	0	0	0.112	0.108	0.154	0.753	0.139	0	0.067	0.149	0.156	0.158	0.158	0.14	0.139	0.139	0.138	0.067	0.067	0.067	0	0	0.373	1.355	0.966	0.834	100	45.954	0.368	0.266
SuMu	0	0	0	0	0	0	0.222	0.092	0	0.532	0	0	0	0	0	0	0	0	0	0	0	0	0	0	0	0	0.111	1.497	1.519	1.527	45.954	100	0.191	0.479
RR1-B	0	0	0	0	0	0	1.265	0.853	1.238	0.255	0.443	0	0	0	0	0	0	0.029	0.118	0.167	0	0	0	0	0	1.499	0.068	0.188	0.18	0.184	0.368	0.191	100	15.918
RcapMu	0	0	0	0	0	0	1.989	0.872	1.009	0.693	0.477	0.603	0.603	0.693	0.697	0.705	0.707	0.759	0.61	0.68	0.662	0.602	0.603	0.603	0.524	2.483	0	0	0	0.082	0.266	0.479	15.918	100
